# Supplementary material for: Dual RNA-Seq Unveils the Role of the Pseudomonas plecoglossicida fliA Gene in Pathogen-Host Interaction with Larimichthys crocea
Source: PubMed Central journal article supplement (PMC6843279; doi:10.3390/microorganisms7100443), 2019-10-11
Supplement: microorganisms-07-00443-s001.pdf [file microorganisms-07-00443-s001.pdf]

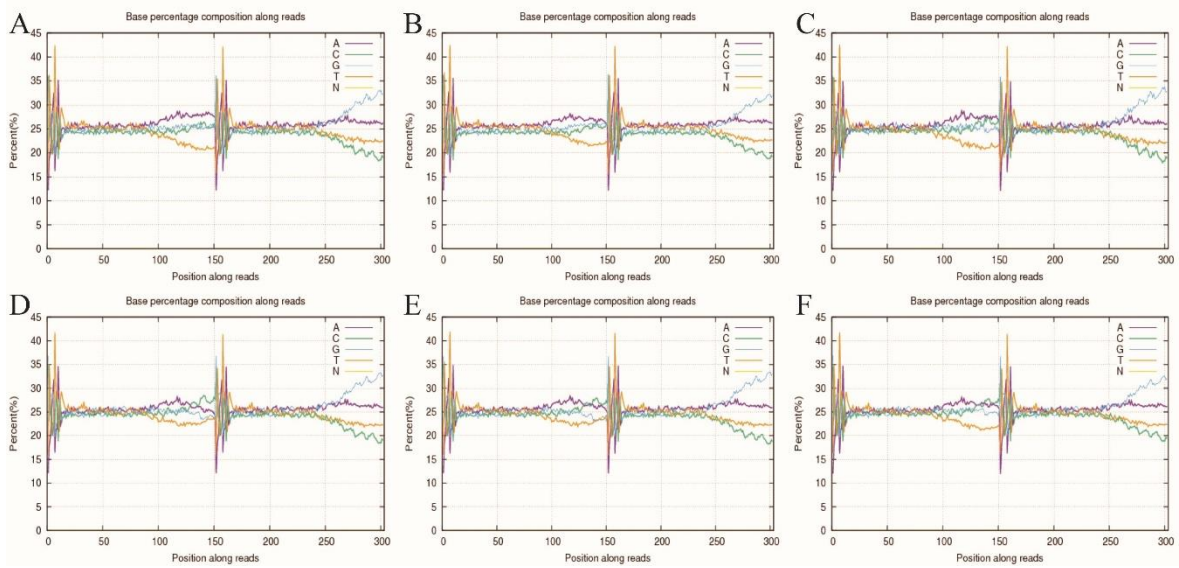

**Figure S1.** Eukaryotic base percentage composition along reads. Horizontal axis is base coordinates of reads, which represent the base from the 5' to the 3' end sequentially. Vertical axis is corresponding percentage, each base with different color. A is purple; C is green; G is blue; T is orange; N is yellow. But in existing high-throughput sequencing technologies, reverse transcribed into cDNA was used in 6 bp random primers can cause a few position of nucleotide composition exist certain preferences, which belongs to the normal situation. (A), (B), (C) are wild type strain; (D), (E), (F) are *fliA*-RNAi strain.

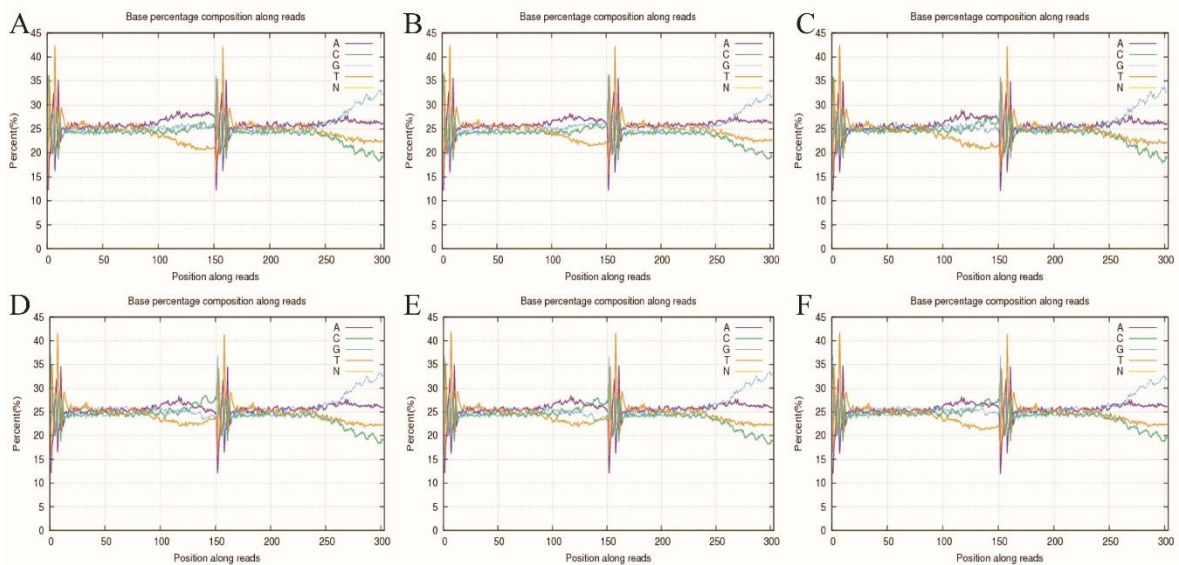

**Figure S2.** Prokaryotic base percentage composition along reads. Horizontal axis is base coordinates of reads, which represent the base from the 5' to the 3' end sequentially. Vertical axis is corresponding percentage, each base with different color. A is purple; C is green; G is blue; T is orange; N is yellow. But in existing high-throughput sequencing technologies, reverse transcribed into cDNA was used in 6 bp random primers can cause a few position of nucleotide composition exist certain preferences, which belongs to the normal situation. (A), (B), (C) are wild type strain; (D), (E), (F) are *fliA*-RNAi strain.

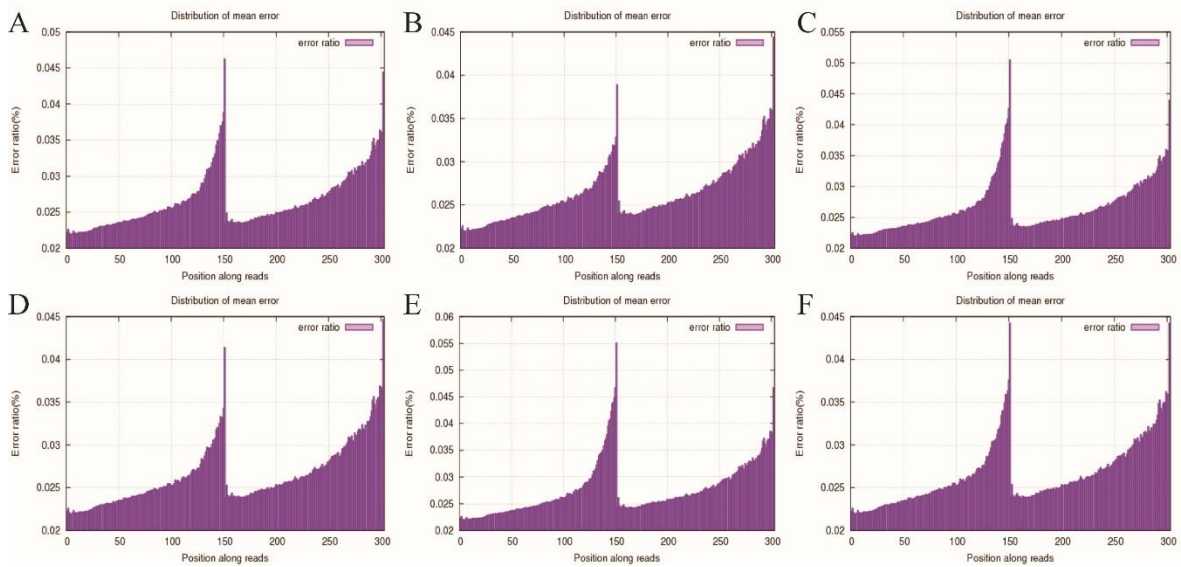

**Figure S3.** Eukaryotic distribution of mean error. Distribution of mean error. Horizontal axis is base coordinates of reads, which represent the base from the 5' to the 3' endsequentially. Vertical axis is the average base error rate of all reads at the site (%). The purple shadow in the graph corresponds to the average value of the base error rate, which reflects the distribution of base error rate in the sequencing reads, and the acceptable range of the average base error rate is less than 0.1%. (A), (B), (C) are wild type strain; (D), (E), (F) are *fliA*-RNAi strain.

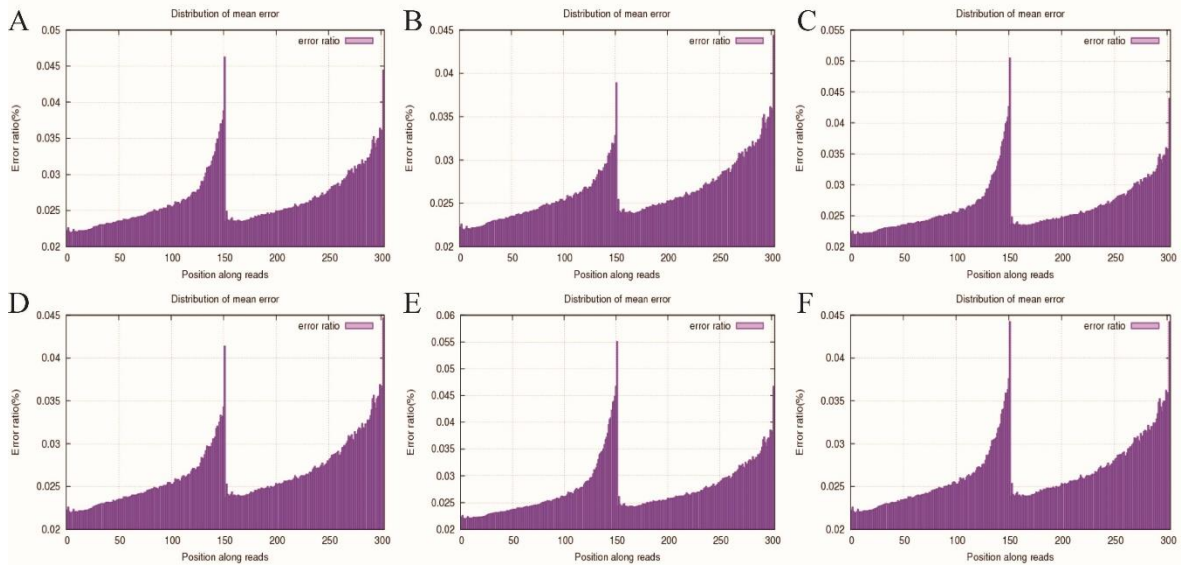

**Figure S4.** Prokaryotic distribution of mean error. Distribution of mean error. Horizontal axis is base coordinates of reads, which represent the base from the 5' to the 3' endsequentially. Vertical axis is the average base error rate of all reads at the site (%). The purple shadow in the graph corresponds to the average value of the base error rate, which reflects the distribution of base error rate in the sequencing reads, and the acceptable range of the average base error rate is less than 0.1%. (A), (B), (C) are wild type strain; (D), (E), (F) are *fliA*-RNAi strain.

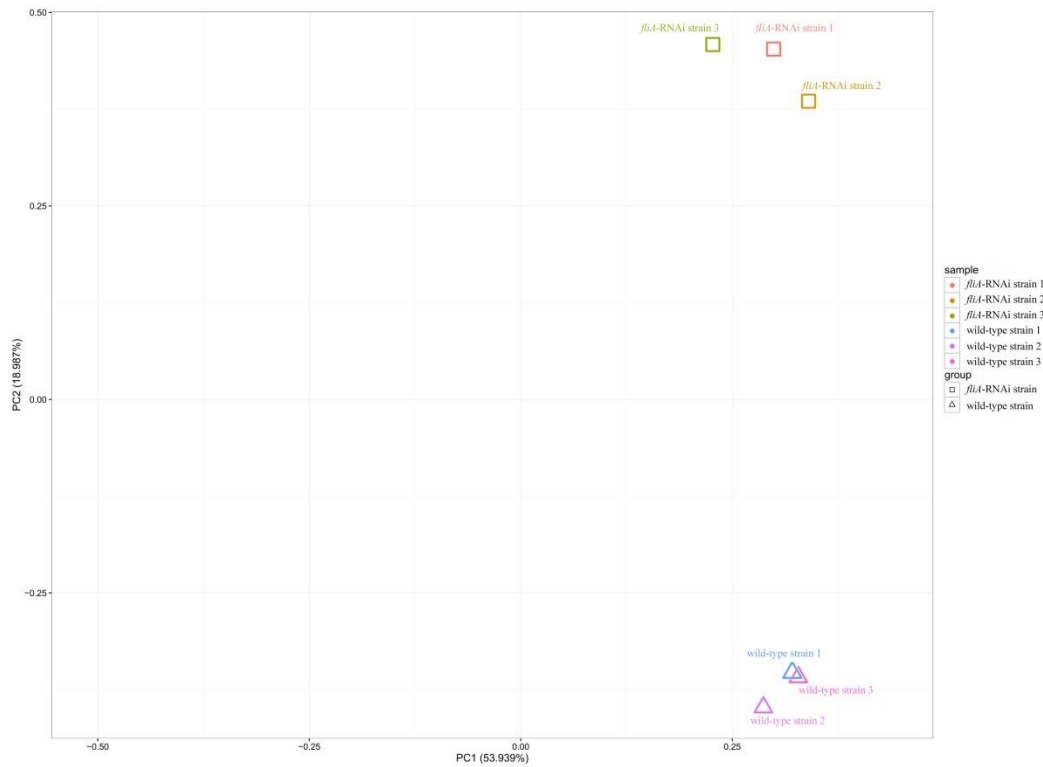

**Figure S5.** Eukaryotic PCA analysis. Principal component analysis(PCA) can reduce the complexity of data, and dig deep the relation between sample size and variation. The basic principle is that diverse samples have different measurement, PCA is to find out the main factors of observed value differences, considering all the factors are combined and sort according to importance. Usually the tiny factors are ignored, which play a role of simplify the data. For two or three principal components axis graphed, which can see the distance of the relationship between each sample, including visual effect of clusters groups.

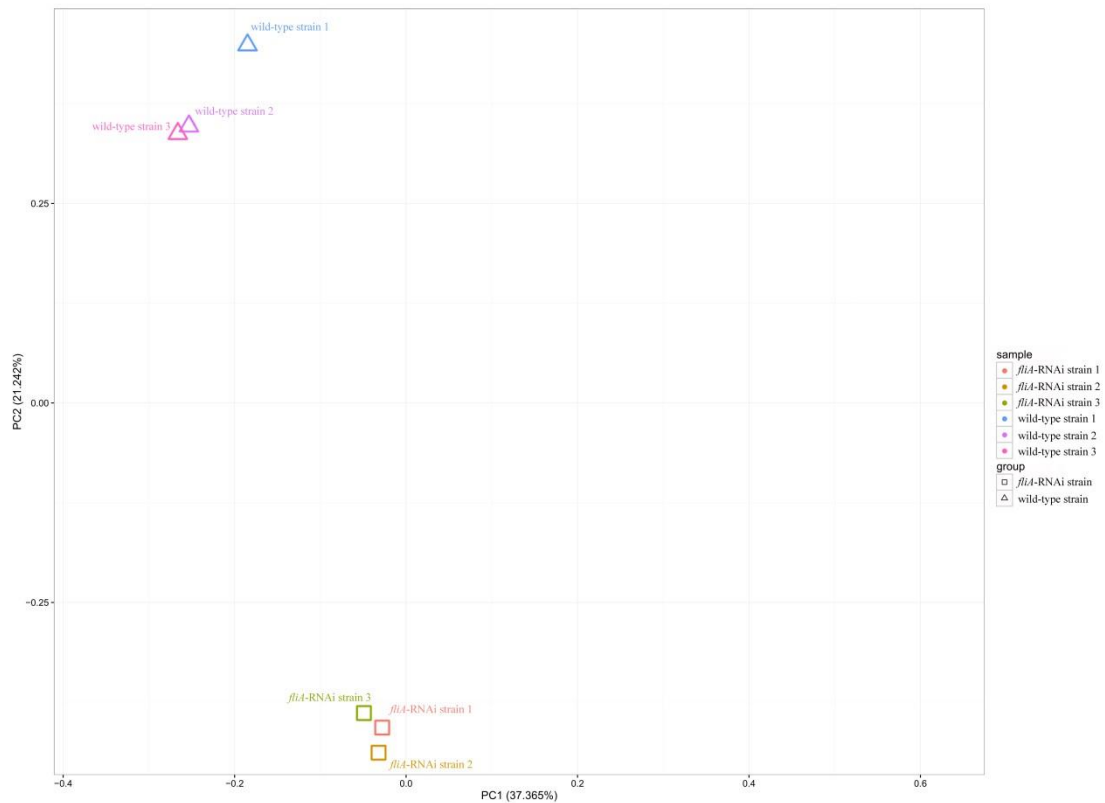

**Figure S6.** Prokaryotic PCA analysis. Principal component analysis(PCA) can reduce the complexity of data, and dig deep the relation between sample size and variation. The basic principle is that diverse samples have different measurement, PCA is to find out the main factors of observed value differences, considering all the factors are combined and sort according to importance. Usually the tiny factors are ignored, which play a role of simplify the data. For two or three principal components axis graphed, which can see the distance of the relationship between each sample, including visual effect of clusters groups.

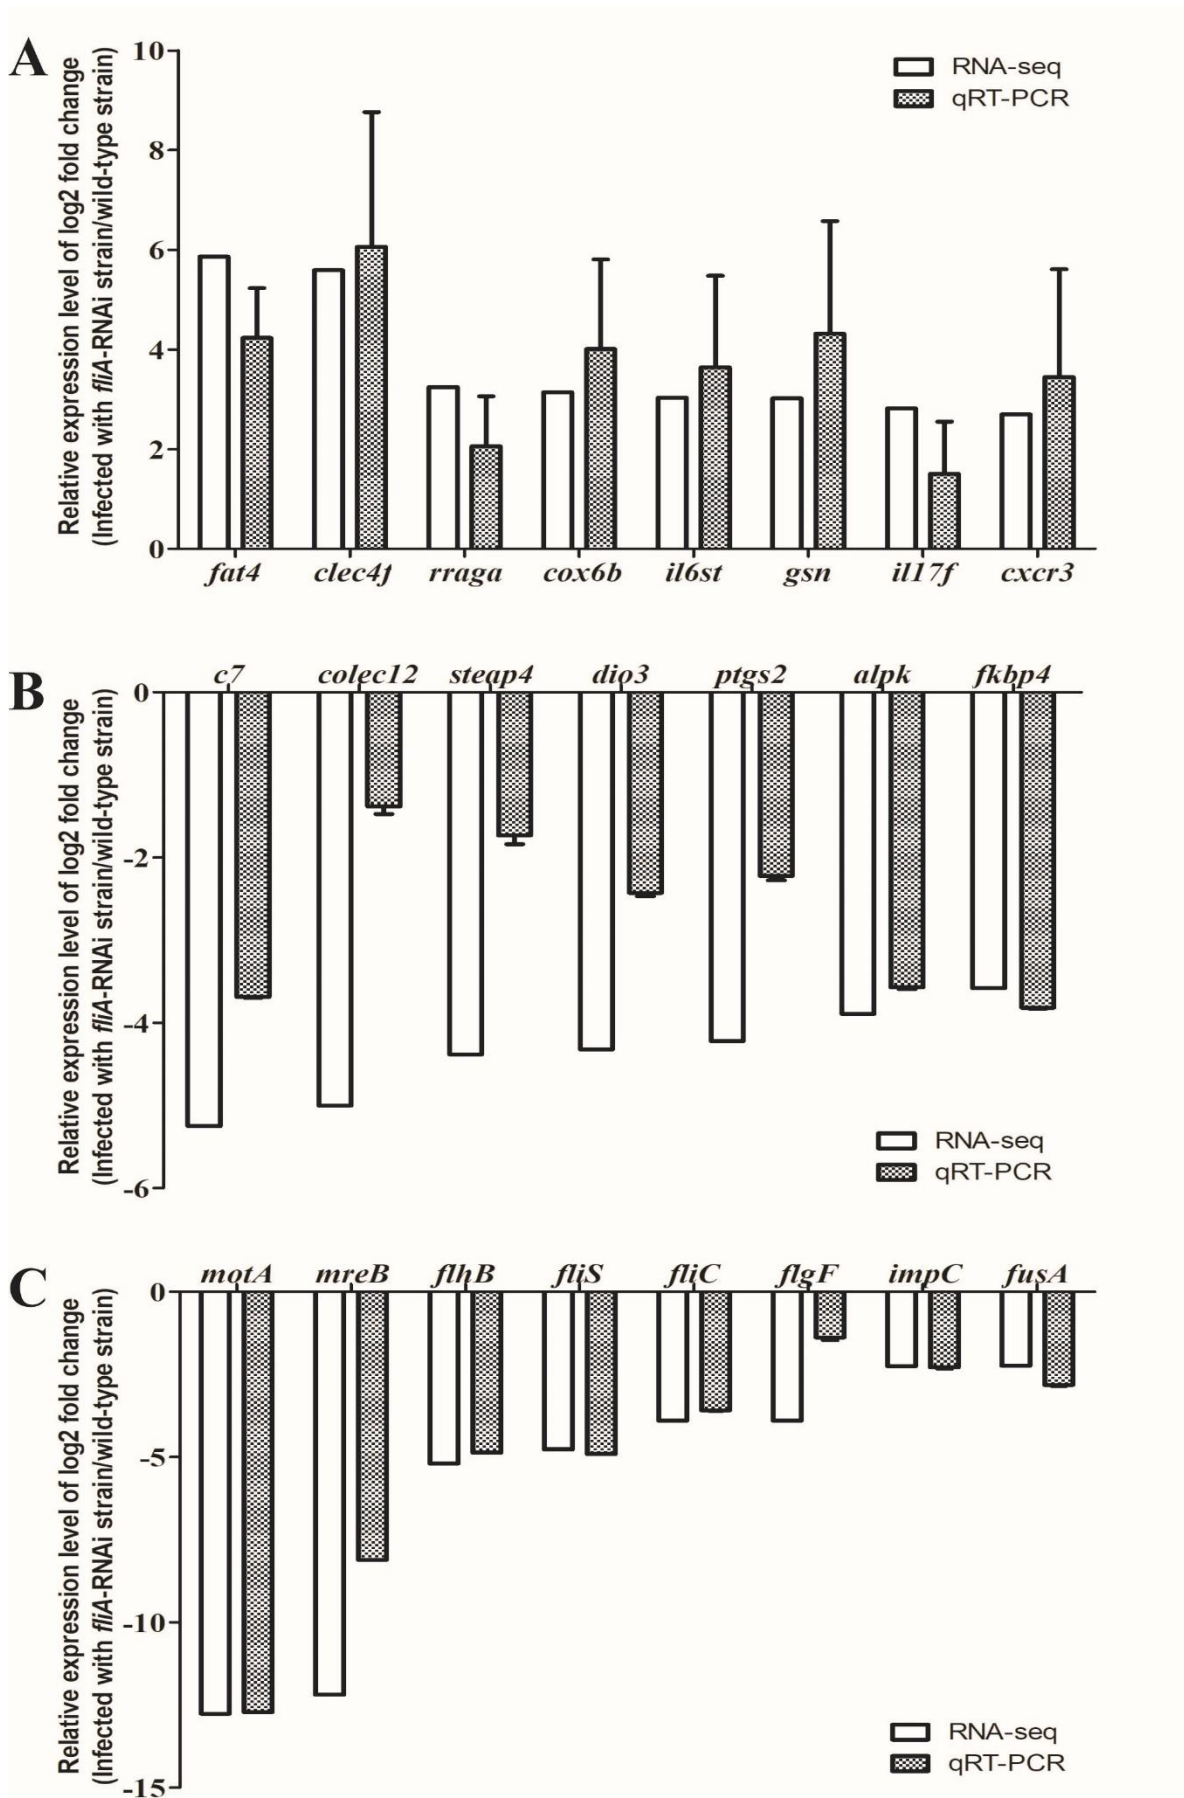

**Figure S7.** Verification transcriptome data by qRT-PCR. Relative changes in abundance of selected genes. qRT-PCR was performed by triple technical repetitions. White bars: RNA-seq; Grid bars: qRT-

PCR. A: up-regulated genes in eukaryotic transcriptome; B: down-regulated genes in eukaryotic transcriptome; C: down-regulated genes in prokaryotic transcriptome.

**Table S1.** List of shRNA sequence used to silence *fliA* expression in present study.

| Name      | Sequence(5'-3' orientation)                                                                                                       |
|-----------|-----------------------------------------------------------------------------------------------------------------------------------|
| shRNA-66  | TGCGTTGGTTGATGGACTACCTTTCAAGAGAAGGTAGTCCATCAACCAACGCTTTTTTT<br>GTACAAAAAAGCGTTGGTTGATGGACTACCTTCTCTTGAAAGGTAGTCCATCAACCAACGCATGCA |
| shRNA-93  | TGGTCAAGCGCATTGTCAATCATTCAAGAGATGATTGACAATGCGCTTGACCTTTTTTT<br>GTACAAAAAAGGTCAAGCGCATTGTCAATCATCTCTTGAATGATTGACAATGCGCTTGACCATGCA |
| shRNA-99  | TGCGCATTGTCAATCAGCTATCTTCAAGAGAGATAGCTGATTGACAATGCGCTTTTTTT<br>GTACAAAAAAGCGCATTGTCAATCAGCTATCTCTTGAAGATAGCTGATTGACAATGCGCATGCA   |
| shRNA-445 | TGCCATCGAAAGCCTCGATACATTCAAGAGATGTATCGAGGCTTTCGATGGCTTTTTTT<br>GTACAAAAAAGCCATCGAAAGCCTCGATACATCTTGAATGTATCGAGGCTTTCGATGGCATGCA   |
| shRNA-656 | TGGGTCTGTCAAGTTGAGTAAGCTTCAAGAGAGCTTACTCAACTGACAGACCCTTTTTTT<br>GTACAAAAAAGGGTCTGTCAAGTTGAGTAAGCTCTTGAAGCTTACTCAACTGACAGACCCATGCA |

**Table S2.** List of qRT-PCR primers used to determine gene expression changes in present study.

| Gene name      | Forward primer sequence(5'-3' orientation) | Reverse primer sequence sequence(5'-3' orientation) | Source     |
|----------------|--------------------------------------------|-----------------------------------------------------|------------|
| <i>16S</i>     | TCAGTATCAGTCCAGGTGGTCC<br>C                | CGTTACCGACAGAATAAGCACC<br>G                         | (1)        |
| <i>β-actin</i> | GACCTGACAGACTACCTCATG                      | AGTTGAAGGTGGTCTCGTGGA                               | (2)        |
| <i>gyrB</i>    | TGCTGAAGGACGAGCGTTCG                       | ATCATCTTGCCGACAACAGC                                | (3)        |
| <i>fliA</i>    | CGAGGGTTTCTTCAGAGCGGTA<br>C                | GCACCAGGCCAATTTCTTTAAG<br>AT                        | This study |
| <i>C7</i>      | GCCGAACCCGTTTACTTG                         | TCATCGCAGGATATGGAC                                  | This study |
| <i>il1b</i>    | TAAGACGGAAGTTTGGAT                         | AAGCGTTTCACTTTCTGTAC                                | This study |
| <i>colec12</i> | GGAGAATGGAATGGGTG                          | GGAGCAGGGAACATCGTA                                  | This study |
| <i>steap4</i>  | GAAGGTGCTGGTGGATGT                         | TCTACTGGCGTCTGAGGG                                  | This study |
| <i>dio3</i>    | GCACCGCTGTTTGGAGGA                         | CGGCGTTGGATGAGTTGTC                                 | This study |
| <i>ptgs2</i>   | TGATGTTGCGATTCTTCG                         | TTGCCTTCCAGGTTGTC                                   | This study |
| <i>alpk</i>    | GGAATGGGTAACGTATGT                         | GAATGGGAACTGAAACTG                                  | This study |
| <i>fkbp4</i>   | CAAGAAGACCTACGCCAATA                       | CTCCCTTCAAATGTCACCA                                 | This study |
| <i>fat4</i>    | GGAATGGGAGAATGGAAC                         | ACAAGACAGAACAGGAGC                                  | This study |
| <i>clec4f</i>  | TCTGAGTGACAGCCTTGA                         | CCTTCCTTCTGCACGATT                                  | This study |
| <i>rraga</i>   | GCGATACGCTCTGTTGAA                         | ACAGCAAAGACAGCCAC                                   | This study |
| <i>cox6b</i>   | AAAGGGTCTACAAATCAATC                       | TCTCCCACCACTTCAACA                                  | This study |
| <i>il16st</i>  | GGCCAAGACGACCTCTAACG                       | GTGCTGTGCTGCCAGTGATT                                | This study |
| <i>gsn</i>     | GATGATGACAAGGCGGACAC                       | GTAGCACTCTTCGGGAGACA                                | This study |
| <i>il17f</i>   | TAGAATCCCGTTTACCTCAG                       | CTTCCTCCCTCCTTTGTTAT                                | This study |
| <i>cxc3</i>    | ACGGACACCTTCCTCCTTCA                       | AACAGCCAATCCAAACACCC                                | This study |
| <i>motA</i>    | TCTTCCTTTGCTATTGCCTGATG                    | TGTTTGAACGCTGGCTTGAC                                | This study |
| <i>mreB</i>    | TCTCGCTGAACGGCGTGGTC                       | GATGCGCTCGGCGGTGGATT                                | This study |
| <i>flhB</i>    | TGGTGGTCAATGTGATGGTAGT                     | GGTGATCGGGTTTAGCTTTT                                | This study |
| <i>fliS</i>    | AAAGGGAAATCGCTGGAGAA                       | AACGGTGCAAACAGTAATCGTA<br>T                         | This study |
| <i>fliC</i>    | GCCTCGTTCCGGTGCCAATCT                      | CGCTTCCAGGGCGTAGTCG                                 | This study |
| <i>flgF</i>    | CAAGGGCGGCGAAGCCTATA                       | CCCGTGGCAACACCGAGACA                                | This study |
| <i>impC</i>    | CGAACTCGTGCCAGAAACCA                       | CCAGGCGGCTGACCACAAAA                                | This study |
| <i>fusA</i>    | CCGTCATCAACTCGGTCAAG                       | CAGGGAAGTCCATACGCTCA                                | This study |

#### Supplementary references

1. Sun, Y.; Luo, G.; Zhao, L.; Huang, L.; Qin, Y.; Su, Y.; Yan, Q. Integration of RNAi and RNA-seq Reveals the Immune Responses of *Epinephelus coioides* to *sigX* Gene of *Pseudomonas plecoglossicida*. *Front. Immunol.* **2018**, *9*, 1624.
2. Zheng, W.; Liu, G.; Ao, J.; Chen, X. (2006). Expression analysis of immune-relevant genes in the spleen of large yellow croaker (*Pseudosciaena crocea*) stimulated with poly I: C. *Fish Shellfish Immunol.* **2006**, *21*, 414-430.
3. Izumi, S.; Yamamoto, M.; Suzuki, K.; Shimizu, A.; Aranishi, F. Identification and detection of *Pseudomonas plecoglossicida* isolates with PCR primers targeting the *gyrB* region. *J. Fish Dis.* **2007**, *30*, 391–397.
